# Supplementary material
Source: PubMed Central journal article supplement (PMC6591646)
Supplement: AAC.02496-18-s0001.pdf [file AAC.02496-18-s0001.pdf]

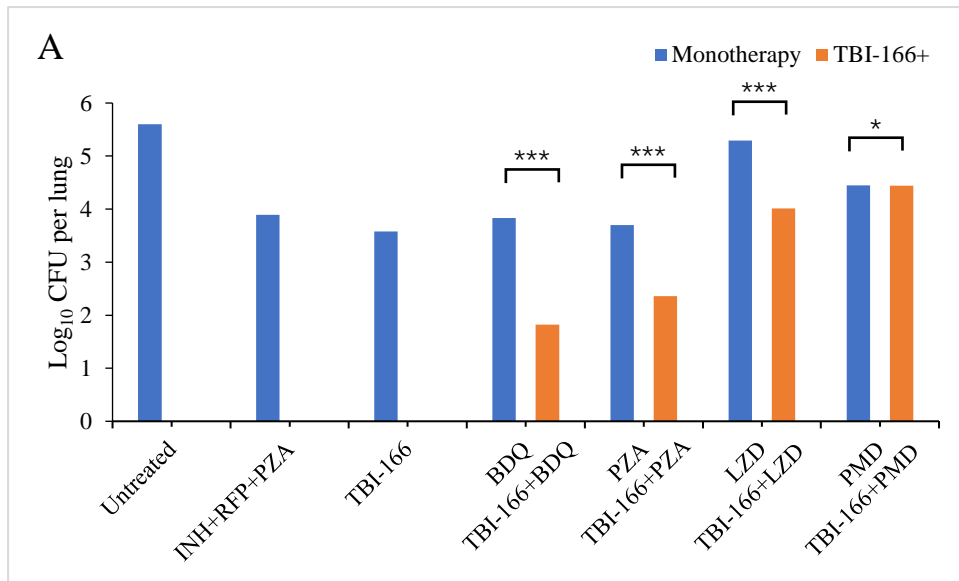

2

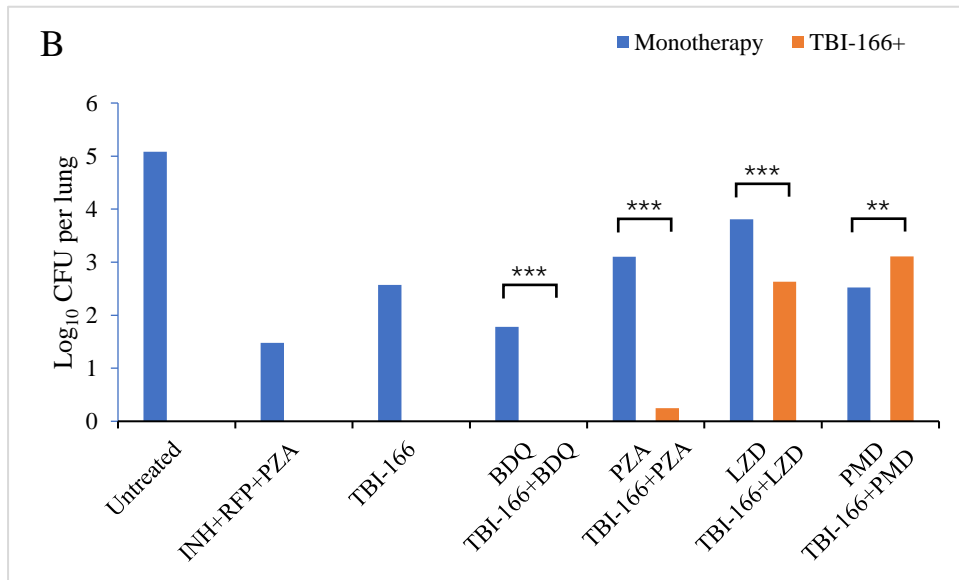

3

4 **FIGS 1.** Efficacy comparison of drugs with or without TBI-166 in BALB/C mice at the  
 5 end of 4 weeks (A) or 8 weeks (B) administration. \* $P > 0.05$ , \*\* $P < 0.05$ , and \*\*\* $P <$   
 6 0.001. TBI-166+, combined with TBI-166. Isoniazid, INH; Rifampin, RFP;  
 7 Pyrazinamide, PZA; Bedaquiline, BDQ; Pretomanid, PMD; Linezolid, LZD.

8 **TABLE S1.** The exact concentrations tested for each drug in checkboard experiment

| Compound | Drug concentration ( $\mu\text{g/ml}$ ) |
|----------|-----------------------------------------|
| INH      | 0.00625 ~ 0.10                          |
| RFP      | 0.00625 ~ 0.10                          |
| BDQ      | 0.005 ~ 0.08                            |
| PMD      | 0.00875 ~ 0.14                          |
| LZD      | 0.0375 ~ 0.60                           |
| TBI-166  | 0.0075 ~ 0.12                           |

9 Note: Isoniazid, INH; Rifampin, RFP; Bedaquiline, BDQ; Pretomanid, PMD; Linezolid,

10 LZD.

11 **TABLE S2.** Lung CFU counts at the indicated time points in BALB/c mice (Values are  
 12 means  $\pm$  SD, standard deviation, n=6).

| Groups              | Mean lung log <sub>10</sub> CFU counts $\pm$ SD at the indicated time points |                 |                 |                 |
|---------------------|------------------------------------------------------------------------------|-----------------|-----------------|-----------------|
|                     | D-18                                                                         | D0              | W4              | W8              |
| Untreated           | 2.23 $\pm$ 0.39                                                              | 6.34 $\pm$ 0.04 | 5.60 $\pm$ 0.38 | 5.08 $\pm$ 0.33 |
| INH+RFP+PZA         |                                                                              |                 | 3.89 $\pm$ 0.23 | 0.50 $\pm$ 0.77 |
| TBI-166             |                                                                              |                 | 3.58 $\pm$ 0.26 | 2.57 $\pm$ 0.47 |
| BDQ                 |                                                                              |                 | 3.83 $\pm$ 0.47 | 1.15 $\pm$ 0.92 |
| PMD                 |                                                                              |                 | 4.45 $\pm$ 0.48 | 2.52 $\pm$ 0.43 |
| PZA                 |                                                                              |                 | 3.70 $\pm$ 0.16 | 3.10 $\pm$ 0.67 |
| LZD                 |                                                                              |                 | 5.29 $\pm$ 0.25 | 3.81 $\pm$ 0.40 |
| TBI-166+BDQ         |                                                                              |                 | 1.53 $\pm$ 0.81 | Negative        |
| TBI-166+PMD         |                                                                              |                 | 4.44 $\pm$ 0.25 | 3.11 $\pm$ 0.36 |
| TBI-166+PZA         |                                                                              |                 | 2.36 $\pm$ 0.19 | 0.25 $\pm$ 0.60 |
| TBI-166+LZD         |                                                                              |                 | 4.01 $\pm$ 0.18 | 2.63 $\pm$ 0.17 |
| TBI-166+BDQ+PMD     |                                                                              |                 | 2.94 $\pm$ 0.26 | Negative        |
| TBI-166+BDQ+LZD     |                                                                              |                 | 0.87 $\pm$ 0.97 | Negative        |
| TBI-166+PMD+LZD     |                                                                              |                 | 4.45 $\pm$ 0.18 | 3.31 $\pm$ 0.29 |
| TBI-166+BDQ+PMD+LZD |                                                                              |                 | 2.45 $\pm$ 0.23 | Negative        |

13 Note: Isoniazid (INH), 10 mg/kg; Rifampin (RFP), 10 mg/kg; Pyrazinamide (PZA),  
 14 150 mg/kg; TBI-166 (20 mg/kg); Bedaquiline (BDQ), 25 mg/kg; Pretomanid (PMD),

15 100 mg/kg; Linezolid (LZD), 100 mg/kg. D, day; W, week. "Negative" means all mice  
16 in this group were culture-negative.

17 **TABLE S3.** Proportion of BALB/c mice with negative culture of lung at the end of  
 18 treatment.

| Group               | W4        | W8         |
|---------------------|-----------|------------|
| CMC                 | 0/6 (0%)  | 0/6 (0%)   |
| INH+RFP+PZA         | 0/6 (0%)  | 4/6 (67%)  |
| TBI-166             | 0/6 (0%)  | 0/6 (0%)   |
| BDQ                 | 0/6 (0%)  | 2/6 (33%)  |
| PMD                 | 0/6 (0%)  | 0/6 (0%)   |
| PZA                 | 0/6 (0%)  | 0/6 (0%)   |
| LZD                 | 0/6 (0%)  | 0/6 (0%)   |
| TBI-166+BDQ         | 1/6 (17%) | 6/6 (100%) |
| TBI-166+PMD         | 0/6 (0%)  | 0/6 (0%)   |
| TBI-166+PZA         | 0/6 (0%)  | 5/6 (83%)  |
| TBI-166+LZD         | 0/6 (0%)  | 0/6 (0%)   |
| TBI-166+BDQ+PMD     | 0/6 (0%)  | 6/6 (100%) |
| TBI-166+BDQ+LZD     | 3/6 (50%) | 6/6 (100%) |
| TBI-166+PMD+LZD     | 0/6 (0%)  | 0/6 (0%)   |
| TBI-166+BDQ+PMD+LZD | 0/6 (0%)  | 6/6 (100%) |

19 Note: Isoniazid, INH; Rifampin, RFP; Pyrazinamide, PZA; Bedaquiline, BDQ;  
 20 Pretomanid, PMD; Linezolid, LZD. D, day; W, week.

21 **TABLE S4.** Lung CFU counts at the indicated time points in C3HeB/FeJNju mice  
 22 (Values are means  $\pm$  SD, standard deviation, n=5).

| Groups          | Mean lung log <sub>10</sub> CFU counts $\pm$ SD at the indicated time points |                 |                 |                 |
|-----------------|------------------------------------------------------------------------------|-----------------|-----------------|-----------------|
|                 | D-32                                                                         | D0              | W4              | W8              |
| Untreated       | 1.19 $\pm$ 0.88                                                              | 5.55 $\pm$ 0.32 | 4.94 $\pm$ 0.81 | 5.03 $\pm$ 0.29 |
| TBI-166         |                                                                              |                 | 3.18 $\pm$ 0.40 | 0.94 $\pm$ 0.94 |
| INH+RFP+PZA     |                                                                              |                 | 1.33 $\pm$ 1.19 | Negative        |
| TBI-166+BDQ+PMD |                                                                              |                 | 1.15 $\pm$ 0.95 | Negative        |
| TBI-166+BDQ+LZD |                                                                              |                 | Negative        | Negative        |
| TBI-166+PMD+LZD |                                                                              |                 | 1.81 $\pm$ 1.81 | Negative        |

23

| Groups          | Mean spleen log <sub>10</sub> CFU counts $\pm$ SD at the indicated time points |                 |                 |                 |
|-----------------|--------------------------------------------------------------------------------|-----------------|-----------------|-----------------|
|                 | D-32                                                                           | D0              | W4              | W8              |
| Untreated       | Negative                                                                       | 5.05 $\pm$ 0.09 | 4.70 $\pm$ 0.62 | 5.00 $\pm$ 0.24 |
| TBI-166         |                                                                                |                 | 3.44 $\pm$ 0.53 | 1.00 $\pm$ 1.06 |
| INH+RFP+PZA     |                                                                                |                 | 0.76 $\pm$ 0.97 | Negative        |
| TBI-166+BDQ+PMD |                                                                                |                 | 1.17 $\pm$ 0.97 | Negative        |
| TBI-166+BDQ+LZD |                                                                                |                 | 0.37 $\pm$ 0.65 | Negative        |
| TBI-166+PMD+LZD |                                                                                |                 | 1.41 $\pm$ 1.50 | Negative        |

24 Note: Isoniazid (INH), 10 mg/kg; Rifampin (RFP), 10 mg/kg; Pyrazinamide (PZA),  
 25 150 mg/kg; TBI-166 (20 mg/kg); Bedaquiline (BDQ), 25 mg/kg; Pretomanid (PMD),  
 26 100 mg/kg; Linezolid (LZD), 100 mg/kg. D, day; W, week. "Negative" means all mice

27 in this group were culture-negative.

28 **TABLE S5.** Proportion of C3HeB/FeJNju mice with negative culture of lung or spleen  
 29 at the end of treatment.

| Group           | W4         |           | W8         |            |
|-----------------|------------|-----------|------------|------------|
|                 | lung       | spleen    | lung       | spleen     |
| CMC             | 0/5 (0%)   | 0/5 (0%)  | 0/5 (0%)   | 0/5 (0%)   |
| TBI-166         | 0/5 (0%)   | 0/5 (0%)  | 2/5 (40%)  | 2/5 (40%)  |
| INH+RFP+PZA     | 2/5 (40%)  | 3/5 (60%) | 5/5 (100%) | 5/5 (100%) |
| TBI-166+BDQ+PMD | 2/5 (40%)  | 2/5 (40%) | 5/5 (100%) | 5/5 (100%) |
| TBI-166+BDQ+LZD | 5/5 (100%) | 4/5 (80%) | 5/5 (100%) | 5/5 (100%) |
| TBI-166+PMD+LZD | 2/5 (40%)  | 2/5 (40%) | 5/5 (100%) | 5/5 (100%) |

30 Note: Isoniazid, INH; Rifampin, RFP; Pyrazinamide, PZA; Bedaquiline, BDQ;  
 31 Pretomanid, PMD; Linezolid, LZD. D, day; W, week.
